# Supplementary material
Source: publisher figshare collection journal article supplement (https://diabetesjournals.figshare.com/articles/dataset/_/23926191)
Supplement: Supplementary file 1 [file 2]

## Sheet: Sheet1
Table S1-Sequence of the RT-PCR primers
	Sequence (5'-3')		NCBI Gene ID
Gene	Forward	Reverse
Gapdh	GCCATCAACGACCCCTTCAT	ATGATGACCCGTTTGGCTCC	14433
Gpr56	CTGCGGCAGATGGTCTACTTC	ATAGTGGAGGGTGCTCTGTTG	14766
Nos3	AGCACCAGACCACAGGTGA	GAGGGTGTCGTAGGTGATGC	18127
Klf4	GAAGGTCGTGGCCCCGGAAA	TCAGTTCATCGGAGCGGGCG	16600
